# Supplementary material for: SNAP23 regulates KCC2 membrane insertion and activity following mZnR/GPR39 activation in hippocampalneurons
Source: PubMed Central journal article supplement — iScience. 2022 Jan 7;25(2):103751. doi: 10.1016/j.isci.2022.103751 (PMC8800107; doi:10.1016/j.isci.2022.103751), 2022-01-07
Supplement: mmc1.pdf [file mmc1.pdf]

iScience, Volume 25

## **Supplemental information**

### **SNAP23 regulates KCC2 membrane insertion and activity following mZnR/GPR39 activation in hippocampal neurons**

**Hila Asraf, Milos Bogdanovic, Noa Gottesman, Israel Sekler, Elias Aizenman, and Michal Hershinkel**

**Figure S1:  $\text{NH}_4^+$  transport in SHSY-5Y cells is mediated by KCC2. Related to Figure 3A.**

SHSY-5Y

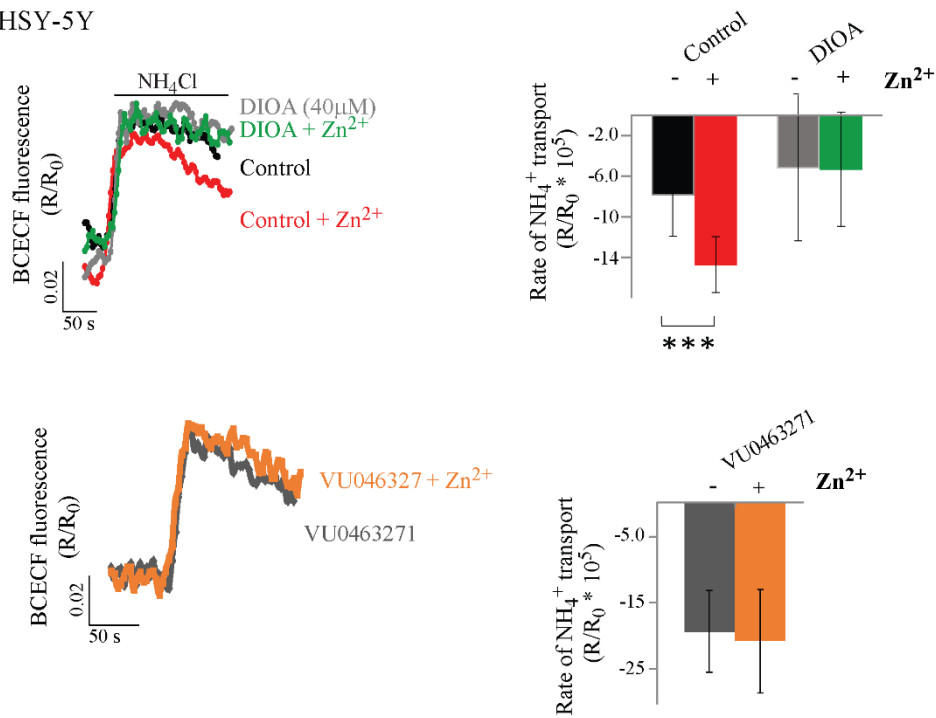

BCECF fluorescent signal traces from SHSY-5Y cells treated with the KCC inhibitor DIOA (40  $\mu\text{M}$ ) or VU463271 (10  $\mu\text{M}$ ) with and without  $\text{Zn}^{2+}$ . Right panels show averaged rates of  $\text{NH}_4^+$  transport. (n= at least 6 coverslips per condition, \*\*\* p<0.0001, t test).

**Figure S2: Silencing SNAP23 reverses KCC3 upregulation by ZnR/GPR39. Related to Figure 3C-D.**

HEK293

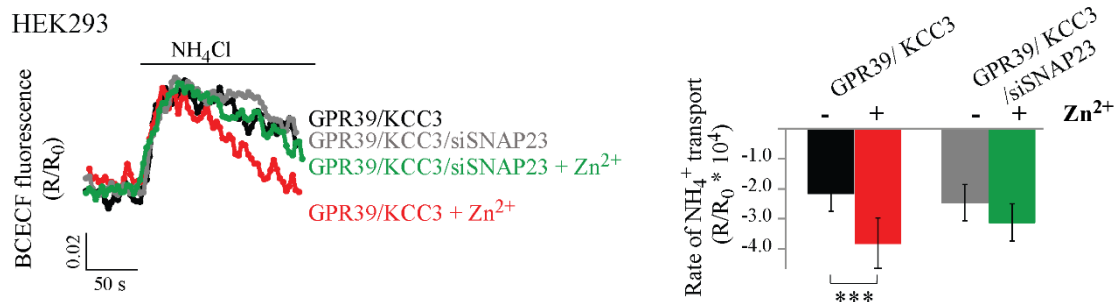

HEK293 cells were co-transfected with GPR39 and KCC3, and with siRNA scrambled sequence or siSNAP23.  $\text{NH}_4^+$  transport rates were determined in BCECF loaded cells. Traces of fluorescence signals from cells treated with  $\text{Zn}^{2+}$  (200  $\mu\text{M}$ , 2 min.) compared to controls are shown. Right panel shows averaged rates of  $\text{NH}_4^+$  transport, obtained during initial 100 s following maximal signal. (n= at least 6 coverslips for each condition, \*\*\* p<0.0001, t test).
